# Supplementary material
Source: PubMed Central journal article supplement (PMC4826291)
Supplement: NIHMS766421-supplement-1.pdf [file NIHMS766421-supplement-1.pdf]

## Supplemental Experimental Procedures

### Donor and Sample Information.

The CH505 donor, from which the CH103 and the CH235 antibody lineages were isolated, is an African male enrolled in the CHAVI001 acute HIV-1 infection cohort (Tomaras et al., 2008) and followed for over 6 years. During this time viral load ranged from 14,460 to 847,279 copies/ml (median = 173,667 copies/ml), and CD4 counts ranged from 69 to 431 cells/mm<sup>3</sup> (median = 294 cells/mm<sup>3</sup>).

The time of infection was estimated by analyzing the sequence diversity in the first available sample using the Poisson Fitter tool (Giorgi et al., 2010) as described in (Liao et al., Nature 2013). Results were consistent with a single founder virus establishing the infection and with the earliest isolated virus sequences being taken 4 weeks post-transmission.

### Flow Cytometry, Memory B Cell Cultures and mAb Isolation.

The HIV-1 CH505.TF gp120 envelope glycoprotein was produced and used in flow cytometry on PBMC collected from donor CH505 at week 264 and 323 post-transmission using a two-color technique as described (Gray et al., 2011).

CH505.TF gp120 Env-positive memory B cells were cultured as described (Bonsignori et al., 2011) with the following modifications: non-irradiated MS40L cells were used as feeder cells at a concentration of 3,000 cells/well and were added to wells in which memory B cells were sorted in bulk; 50 ng/ml of recombinant human (rHu) IL-21 (200-21; Peprotech, Rocky Hill, NJ) were added to the complete medium; memory B cells were distributed by limiting dilution at a calculated concentration of 2 cells/well; culture medium was refreshed every 5 days.

Cell culture supernatants were screened for neutralization of autologous CH505.TF virus using the tzm-bl neutralization assay (Bonsignori et al., 2011; Montefiori, 2005) and for binding to CH505.TF gp120 Env, CH505.TF Δ371I gp120 Env mutant, HIV-1 Env resurface core protein 3 (RSC3) and RSC3 Δ371I (Wu et al., 2010).

MAbs CH235.10 through CH235.13 were isolated from cultures that displayed differential binding of CH505.TF and CH505 TF Δ371I gp120 Env, did not bind to RSC3 (Gao et al., 2014) and neutralized 13 to 99% CH505.TF infectivity.

CH235 lineage antibody frequency over total memory B cells was calculated by dividing the number of CH235 lineage antibodies isolated at week 41 (n = 5; Gao et al., 2014) for the number of memory B cells analyzed (n = 27,950). CH235 lineage antibody frequency over CH505.TF gp120 Env-specific memory B cells was calculated by dividing the number of CH235 lineage antibodies isolated at weeks 264 and 323 (n = 4) for the number of CH505.Env gp120-specific memory B cells analyzed (n = 794).

### 454 Pyrosequencing of CH235 lineage heavy chains.

Antibody heavy chain gene rearrangements were PCR amplified from 6 independent 100ng genomic DNA aliquots to generate 6 barcoded libraries per sample. Multiplexed primers complementary to the IGHV FR1 or FR2 framework regions, and an IGHJ-primer were modified from the BIOMED-2 consortium primers (Boyd et al., 2009; van Dongen et al., 2003). 10-nucleotide 'barcode' sequences in the primer sets encoded sample identity and replicate library identity. AmpliTaq Gold (Roche) enzyme was used for PCR following the manufacturer's instructions, with a thermocycler program: 94°C 5 min; 35 cycles of (94°C 30 sec, 60°C 45 sec, 72°C 90 sec); and final extension at 72°C for 10 min. Following quantitation, PCR products from each replicate library were pooled in equimolar amounts, then the pooled library was run on a 1.5% agarose gel and gel extracted (Qiagen). High-throughput sequencing was performed on the 454 (Roche) platform using Titanium chemistry.

### Antibody production.

Immunoglobulin genes of mAbs CH235.10 through CH235.13 were amplified from RNA from isolated cells, expression cassettes made, and mAbs expressed as described (Gao et al. 2014). The V<sub>H</sub> genes of mAbs CH235.6 through CH235.9 were retrieved from sequences obtained through genomic DNA 454 sequencing, which were restored to full length and complemented with the V<sub>L</sub> of the phylogenetically closest isolated antibody in the CH235 lineage (i.e. CH241 for CH235.6 and CH235.8, and CH236 for CH235.7 and CH235.9). We have previously described the isolation of mAbs CH235, CH236, CH239, CH240 and CH241 and the inference of unmutated common ancestor (UCA) and intermediate antibodies IA1 through IA4 (Gao et al., 2014; Kepler, 2013). Heavy chain plasmids were co-transfected with appropriate light chain plasmids at an equal ratio in Expi 293 cells using either 293Fectin or ExpiFectamine 293 transfection reagents (Thermo Fisher Scientific) according to the manufacturer's protocols. Cultures were supplemented with AbBooster antibody expression enhancer media (ABI

Scientific) at 10% of the final culture volume 24 h after transfection. Cultures were then incubated at 33°C for 5 more days, and supernatants were harvested and passed over a protein A affinity column. Following PBS wash and low pH elution, the pH of eluate was neutralized with 1M Tris pH 8.5 and samples were dialyzed against PBS. Antibodies were then aliquoted and stored at -80°C prior to use. Alternatively, for ExpiFectamine transfections we used the enhancer provided with the kit, transfected cultures were incubated at 37°C 8% CO<sub>2</sub> for 2-6 days, harvested, concentrated and incubated overnight with Protein A beads at 4°C on a rotating shaker before loading the bead mixture in columns for purification; following PBS/NaCl wash, eluate was neutralized with Trizma hydrochloride and antibody concentration was determined by Nanodrop. Purified antibodies were tested in SDS-Page Coomassie and western blots, and stored at 4°C.

### **Direct-binding ELISA.**

Direct-binding ELISAs were performed as described previously (Bonsignori et al., 2011) with the following modifications: plates were blocked for 1 h at room temperature (RT) or overnight at 4°C (both procedures were previously validated); primary purified antibodies were tested at a starting concentrations of 100 µg/ml, serially three-fold diluted and incubated for 1 h at RT; HRP-conjugated human IgG antibody was added at optimized concentration of 1:30,000 in assay diluent for 1 hour and developed using TMB substrate; plates were read at 450 nm in a SpectraMax 384 PLUS reader (Molecular Devices, Sunnyvale, CA); results are reported as logarithm area under the curve (LogAUC) unless otherwise noted.

For cell culture supernatant screening of RSC3 and RSC3 Δ371I HIV-1 Env core proteins reactivity, plates were coated with streptavidin (2 µg/ml); blocked plates were stored at -20°C until used; 10 µl/well of biotinylated avi-tagged RSC3 and RSC3 Δ371I were added at 2 µg/ml for 30 minutes at RT and culture supernatants were added at 1:3 dilution in assay diluent; plates were developed for 10 min using SureBlue Reserve TMB (53-00-03; KPL, Gaithersburg, MD) equilibrated at RT.

Competition ELISAs were performed using 10 µl of primary purified monoclonal antibody, starting at 100 µg/ml and diluted in a two-fold concentration, incubated for 1 h at RT; for CD4 binding site blocking assays, 10 µl of a saturating concentration soluble CD4 (Progenics Pharm Inc.) was added following antibody incubation step. Ten µl of biotinylated target Mab was added at the EC<sub>50</sub> determined by a direct binding of biotinylated-Mab for one hour at RT. After background subtractions, percent inhibition was calculated as follows: 100-(sera triplicate mean/no inhibition control mean)\*100.

Autoimmune purified antigens histones (whole), Jo-1, RNP/Sm, Scl-70, Sm, SSA (Ro), SSB (all from ImmunoVision) and centromere B (Prospec) were coated at optimal concentrations determined by lot-specific checkerboard with positive controls. All plasma antibody positive controls were purchased from ImmunoVision; lot-specific optimal ranges for standard curves were determined. All antibodies were tested using the same lots for each antigen and positive controls with the protocol described above. For DNA ELISA, plates were coated with 2 µg/ml poly-lysine (Sigma-Aldrich) for 2 h at RT, washed 3X with PBS and blocked with PBS/2% BSA/0.05% Tween-20 for 2h at RT. After 3X wash, DNA (LS002195, Worthington) in saline sodium citrate buffer was added for 1 h, washed and antibodies were incubated for 1 h. Secondary antibody was diluted in PBS/0.05% Tween-20. Plates were developed for 30 min. Human recombinant monoclonal antibody Ab008391 (courteously provided by David Easterhoff, Duke Human Vaccine Institute) was used as positive control. For all autoantigen ELISAs, palivizumab was used as negative control. For each antibody, LogAUC was calculated and data are presented semi-quantitatively: no binding =  $\log AUC_{Ab} \leq 2X$  negative control  $\log AUC_{neg\ ctrl}$ ; to quantify antibody binding we divided ( $\log AUC_{pos\ ctrl} - 2X \log AUC_{neg\ ctrl}$ ) in tertiles and expressed test antibody binding as weak (+), intermediate (+ +) or strong (+ + +) if  $\log AUC_{Ab}$  was in the first, second or higher tertile, respectively.

Anti-cardiolipin ELISA was performed using the QUANTA Lite ACA IgG III kit (708625; INOVA Diagnostics) following manufacturer's protocol.

### **Assessment of virus neutralization using a large panel and calculation of neutralization dendrograms.**

Neutralizing antibody assays in TZM-bl cells were performed as described previously (Montefiori, 2005). Neutralization breadth of CH235 UCA, CH235, CH235.9 and CH235.12 neutralization breadth was assessed using the 384-well plate declination of the assay using an updated panel of 199 geographically and genetically diverse Env-pseudoviruses representing the major circulating genetic subtypes and recombinant forms as described (Seaman et al., 2010; Wu et al., 2010). The data were calculated as a reduction in luminescence units compared with control wells, and reported as IC<sub>50</sub> in µg/ml (Montefiori, 2005).

Dendrograms were calculated using the neighbor-joining method, showing the protein sequence distance from the HIV-1 Env gp160 sequences of 190 HIV-1 primary isolates. The clades of HIV-1, including circulating recombinant forms (CRFs) are indicated.

### **Antibody neutralization fingerprinting analysis.**

Neutralization fingerprints were computed and compared for CH235, CH235.9 and CH235.12 from the CH235 lineage, other CD4-binding-site antibodies, and antibodies targeting other sites of vulnerability on HIV-1 Env. The fingerprints were computed over a common panel of 165 HIV-1 strains with neutralization data for all antibodies, and a hierarchical clustering procedure was applied for building the tree, as described in (Georgiev et al., 2013). Briefly, for each antibody, the neutralization data for the common set of 165 HIV-1 strains formed that antibody's neutralization fingerprint. The Spearman correlation coefficients for all pairs of antibody neutralization fingerprints were then computed, transforming the antibody-virus neutralization matrix into an antibody-antibody correlation matrix. This correlation matrix was then input into a hierarchical clustering procedure as a way to visualize the similarities between the neutralization fingerprints for the different antibodies. The distances in the resulting tree are thus a function of the differences between fingerprints.

### **VH1-46 and VH1-2 antibody dendrogram calculation.**

Phylogenetic trees for multiple antibodies derived from VH1-46 and VH1-2 heavy chain variable genes were calculated using the neighbor-joining method. The sequences are aligned by Clustal Omega, calculated using ClustalW2. Dendrograms were drawn in Figtree.

### **Production and purification of HIV-1 Env protein complexed to antigen-binding fragments.**

HIV-1 gp120 protein from clade AE 93TH057 and antibodies of CH235, CH235.9 and CH235.12 were produced and purified as described previously (Zhou et al., 2010). Fab fragments of antibodies were prepared by digesting purified IgG with Lys-C at 37°C for 2-4 h. The digestion reaction was quenched by the addition of cComplete protease inhibitors (Roche). The digested antibodies were passed over Protein A agarose to remove the Fc fragment. The Fab was further purified over a Superdex 200 gel filtration column and concentrated aliquots were stored at -80 °C.

### **X-ray crystallography.**

The gp120-antibody complexes were formed by mixing deglycosylated gp120 with the antibody Fab in a 1:1.5 molar ratio. The complexes were purified by size exclusion chromatography (Hiload 26/60 Superdex S200 prep grade; GE Healthcare) with buffer containing 0.35 M NaCl, 2.5 mM Tris (pH 7.0), and 0.02% NaN<sub>3</sub>. Fractions with gp120-antibody complexes were concentrated to ~10 mg/ml and used for crystallization experiments. All gp120-Fab complexes were screened against 576 crystallization conditions using a Cartesian Honeybee crystallization robot. Initial crystals were grown by the vapor diffusion method in sitting drops at 20 °C by mixing 0.2 µl of protein complex with 0.2 µl of reservoir solution. Crystals were manually reproduced in hanging drops by mixing 0.50 µl protein complex solution with 0.5 µl reservoir solution.

The 93TH057 core<sub>e</sub> gp120-CH235 complex was crystallized with a reservoir solution of 25% (w/v) of PEG2000, 0.2 M of Li<sub>2</sub>SO<sub>4</sub>, 0.1 M of Tris-HCl pH 8.5 and 5% (v/v) of isopropanol and was flash frozen in liquid nitrogen in mother liquor supplemented with 15% of 2R,3R-butanediol as a cryoprotectant. The 93TH057 core<sub>e</sub> gp120-CH235.9 complex was crystallized with a reservoir solution of 9% (w/v) of PEG8000, 19% (w/v) of PEG400, 0.1 M HEPES pH 7.5 and was flash frozen in mother liquor supplemented with an additional 15% PEG 400 as a cryoprotectant. The 93TH057 core<sub>e</sub> gp120-CH235.12 complex was crystallized with a reservoir solution of 10% PEG 8000, 20% PEG 400 and 100 mM HEPES, pH7.5 and was flash frozen in mother liquor supplemented with an additional 15 - 20% PEG 400 as a cryoprotectant.

Data for all crystals were collected at a wavelength of 1.00Å at SER-CAT beamlines ID-22 and BM-22 (Advanced Photon Source, Argonne National Laboratory). All diffraction data were processed with the HKL2000 suite, structures were solved by molecular replacement using PHASER, and iterative model building and refinement were performed in COOT and PHENIX, respectively. For 93TH057core<sub>e</sub> complexes with CH235.9 and CH235.12, molecular replacement solutions were obtained using EAF31403.1-CH235 complex as a search model.

Throughout the refinement processes, a cross validation ( $R_{\text{free}}$ ) test set consisting of 5% of the data was used and hydrogen atoms were included in the refinement model. Structure validations were performed periodically during the model building/refinement process with MolProbity. The 93TH057 core<sub>e</sub>-CH235 structure was refined to a final  $R_{\text{free}}$  value of 22.9% with 96% residues in the favored region of the Ramachandran plot, and 0.1% outliers. The 93TH057 core<sub>e</sub>-CH235.9 structure was refined to a final  $R_{\text{free}}$  value of 22% with 97.1% residues in the favored region of the Ramachandran plot, and 0% outliers. The 93TH057 core<sub>e</sub>-CH235.12 structure was refined to a final  $R_{\text{free}}$  value of 23% with 97.0% residues in the favored region of the Ramachandran plot, and 0.1% outliers. All figures containing representations of the protein crystal structures were made with PyMOL. Gp120 and antibody interactions were analyzed with the PISA server.

### Surface Plasmon Resonance Affinity and Kinetics Measurements.

For kinetic measurement, each antibody was captured on an anti-human IgFc immobilized sensor surface (200-500RU) and gp120 proteins at varying concentrations were injected to monitor association and dissociation phases. Buffer reference and non-specific binding to a control antibody (palivizumab) captured surface were used to derive specific binding signals. Kinetic rate constants and dissociation constant (Kd) were derived from global curve fitting analysis using a Langmuir 1:1 interaction model using the BIAevaluation 4.1 software (GE Healthcare).

### Electron microscopy data collection and processing.

BG505 SOSIP.664 and B41 SOSIP.664 gp140 trimers were expressed in HEK293F cells and purified by 2G12-affinity and gel filtration chromatography as described elsewhere (Pugach et al., 2015; Sanders et al., 2013). Trimers were incubated with a 10 molar excess of Fab (CH235, CH235.9, or CH235.12) overnight at room temperature and the complexes were diluted to ~0.03 mg/mL prior to application onto a carbon-coated 400 Cu mesh grid that had been glow discharged at 20 mA for 30 s. The grids were stained with 2% (w/v) uranyl formate for 60 seconds. Samples were imaged using a FEI Tecnai T12 electron microscope operating at 120 keV, with an electron dose of ~25 e<sup>-</sup>/Å<sup>2</sup> and a magnification of 52,000x that resulted in a pixel size of 2.05 Å at the specimen plane. Images were acquired with Legion (Suloway et al., 2005) using a Tietz TemCam-F416 CMOS camera with a nominal defocus range of 1000-1500 nm. Automated particle picking, stack creation, and initial 2D classification was performed in the Appion software suite (Lander et al., 2009). Noise and junk particles were discarded and the remaining stack was subjected to 3D classification using Relion (Scheres, 2012) with an EM volume created from the x-ray structure of ligand-free BG505 SOSIP.664 (PDB: 4zmj) low pass filtered to 60 Å as the reference model. While both CH235.9 and CH235.12 bound to either B41 or BG505 at predominantly full stoichiometry (3 Fabs per trimer), CH235 bound to either trimer at sub-stoichiometric ratios (1 Fab per BG505 trimer and 2 Fabs per B41 trimer). The 3D classes representing the predominant stoichiometry for each complex were used as the initial models (low pass filtered to 40 Å) for further refinement using Relion, with C3 symmetry imposed for complexes with CH235.9 or CH235.12. The total number of particles used in refinement and final resolution of the map using a Fourier shell correlation of 0.5 are as follows: BG505 in complex with CH235 – 3,467 particles (~25 Å); B41 in complex with CH235 – 4,248 particles (~24 Å); BG505 in complex with CH235.9 – 2,567 particles (25 Å); B41 in complex with CH235.9 – 8,061 particles (19 Å); BG505 in complex with CH235.12 – 15,565 particles (17 Å); B41 in complex with CH235.12 – 17,023 particles (16 Å).

To create figures of each Fab in complex with a representative trimer, the 3D reconstructions for each complex were fit into an EM volume created from the x-ray structure of unliganded BG505 SOSIP.664 (PDB: 4ZMJ) low pass filtered to 30 Å in UCSF Chimera (Pettersen et al., 2004) and using the “segment map” option to isolate the density of the Fab components alone. Two-dimensional back projections of the final 3D models were generated using EMAN (Tang et al., 2007).

### Epitope visualization.

The HIV-1 gp120 epitopes targeted by donor CH235 antibodies were visualized using PyMOL (Schrodinger, 2010). In this graphic program, we used 5.5-Å distance for selection of epitope atom sets which were virtually identical to those defined by protein interface analysis program PISA.

### Monoclonal antibody CH235.9 amino acid reversion.

Primers were designed with the online Agilent Quikchange primer designer tool (www.thermofisher.com) and were as follows:

CH235.9<sub>N30T</sub>: CGTGGCGTCTGGATACAACCTTCACCGACTACTATATAC;  
CH235.9<sub>D31T</sub>: CGTCTGGATACAACCTTCAACACCTACTATATACTGGGTGC;  
CH235.9<sub>G62Q</sub>: GGTCGCACAGATTACGCACAGGCGTTTGGGGA;  
CH235.9<sub>G65Q</sub>: GATTACGCAGGGGCGTTTCAGGACAGAGTGTCCTCA;  
CH235.9<sub>A103E</sub>: GTTAGAAATGTGGGAACGGAGGGCAGCTTGCTCCACTATG;  
CH235.9<sub>G62Q/G65Q</sub>: GGTCGCACAGATTACGCACAGGCGTTTCAGGACAGAGTGTCCTCA;  
CH235.9<sub>S54R</sub>: GGATCGACCCTAGGGGTGGTTCGCACAG;  
CH235.9<sub>A61S</sub>: GTGGTCGCACAGATTACTCAGGGGCGTTTG.

Presence of mutations in plasmid products was confirmed by single-colony sequencing.

### Structural bioinformatics.

Average buried surface area (BSA) on gp120 was calculated for residues with  $BSA > 1 \text{ \AA}^2$  for the gp120-antibody complexes, and the corresponding antibody neutralization potencies were averaged for each of those residues based on data from neutralization assays. Spearman correlation between BSA on gp120 and antibody potencies was calculated for BSA cutoffs = 0 to  $85 \text{ \AA}^2$  and potency  $\log IC_{50}$  cutoffs = 0.60 to  $1.62 \mu\text{g/ml}$ .

### Sample preparation for 5' RACE method and 454 pyrosequencing.

Human PBMCs ( $6 \times 10^7$ ) were obtained from three HIV-1 and hepatitis C negative individuals (LP32647, LP08248 and LP23810). A 5' RACE approach was developed to amplify immunoglobulin genes based on previously described methods (Venturi et al., 2011). Briefly, the PBMCs were pelleted at 1200 rpm for 8 min. mRNA was then extracted and eluted in 50  $\mu\text{l}$  elution buffer using  $\mu\text{MACS}$  mRNA isolation kit (Miltenyi Biotec) according to manufacturer's instructions. To synthesize cDNA, 10  $\mu\text{l}$  mRNA was mixed with 1  $\mu\text{l}$  5'CDS Oligo dT primers (12  $\mu\text{M}$ ) and incubated at  $70 \text{ }^\circ\text{C}$  for 1 min and then  $-20 \text{ }^\circ\text{C}$  for 1 min. Then 1  $\mu\text{l}$  SMARTER Oligo Primer (12  $\mu\text{M}$ ) (Clontech), 4  $\mu\text{l}$  5X RT buffer, 1  $\mu\text{l}$  DTT 20 (20mM), 1  $\mu\text{l}$  dNTP (10mM), 1  $\mu\text{l}$  RNase out and 1  $\mu\text{l}$  SuperScript II reverse transcriptase (Invitrogen) were added to the reaction. After 2 hours incubation at  $42 \text{ }^\circ\text{C}$ , the cDNA products were purified using Nucleospin II kit (Macherey-Nagel) and eluted in 50  $\mu\text{l}$  water. 454 pyrosequencing was performed as described previously (Wu et al., 2011). The first PCR amplification was performed with a common 5' primer II A (Clontech) and an Ig gene specific 3' primer (5'GGGGAAGACCGATGGGCCCTTGGTGG3') using KAPA HIFI qPCR kit (Kapa Biosystems). The PCR products were purified with 2% Size Select Clonewell E-gel (Invitrogen) and Agencourt AMPure XP beads (Beckman Coulter). The second PCR amplification was performed with primers with 454 sequencing adapters (454-RACE-F: 5'CCATCTCATCCCTGCGTGTCTCCGACTCAGAAGCAGTGGTATCAACGCAGAGT3'; 454-IgG-R: 5'CCTATCCCCTGTGTGCCTTGGCAGTCTCAGGGGGAAGACCGATGGGCCCTTGGTGG3'). The PCR products were again purified with 2% Size Select Clonewell E-gel and Agencourt AMPure XP beads.

### Germline V gene specific substitution profile.

The raw reads from three healthy donors shorter than 300 nucleotides or longer than 600 nucleotides in length were not analyzed. Germline V gene was then assigned to each read using an in-house bioinformatics pipeline (Wu et al., 2015). We removed reads containing stop codons. Functional reads were then clustered using Usearch at 97% sequence identity, and one unique sequence was selected from each cluster to derive a curated dataset. To further reduce reads containing sequencing errors in the curated dataset, unique sequences having only one read in the clustering step were excluded. Finally, the curated dataset of the three donors were pooled for substitution frequency analyses.

Reads from the curated dataset that were assigned to germline V genes of interest were extracted, and were aligned using MUSCLE (Edgar, 2004). The amino acid substitution frequency or mutability of a V gene position was calculated by counting how many reads contain amino acids that are different from the germline V gene, and normalized by the total number of reads. We further calculated the frequency of the 19 types of amino acid substitutions at a position, which was used to generate positional substitution logo. The similarity of positional substitution frequency profiles between V genes of interest was measured by Pearson correlation coefficient.

### Conformity analysis.

The positional conformity of a conforming antibody sequence  $A$  to a reference sequence  $B$  is defined as the number of mutated positions shared by both sequences divided by the total number of mutations in the conforming sequence. Thus:

$$c_p(A; B) = \frac{|M_A \cap M_B|}{|M_A|}$$

where  $M_i$  represents the set of amino acid positions in sequence  $i$  which are mutated from the germline V residue. Insertions and missing data are ignored, but deletions relative to the germline V are counted as mutations. For 8ANC131 and CH235 (Figure S3A):

$M_{8ANC131} = \{2, 9, 10, 11, 16, 19, 20, 23, 26, 30, 31, 32, 33, 34, 37, 45, 46, 48, 50, 52, 53, 55, 57, 58, 59, 60, 62, 63, 66, 68, 69, 70, 71, 74, 77, 80, 84, 85, 88, 89\}$

$M_{CH235} = \{19, 23, 31, 34, 46, 47, 50, 52, 55, 57, 59, 63, 68, 83, 84\}$

$M_{8ANC131} \cap M_{CH235} = \{19, 23, 31, 34, 46, 50, 52, 55, 57, 59, 63, 68, 84\}$

$c_p(8ANC131, CH235) = 13 / 15 = 86.7\%$

Identity conformity was defined the number of positionally conforming sites in conforming antibody  $A$  which were also mutated to the same residue as in the reference antibody  $B$ . Thus:

$$c_i(A; B) = \frac{\sum_{x \in \{M_A \cap M_B\}} \delta_{A_x B_x}}{|M_A|}$$

where  $\delta$  is the Kronecker delta function and  $A_x$  is the identity of the residue at position  $x$  of sequence  $A$ . For 8ANC131 and CH235 (Figure S3B):  $c_i(8ANC131, CH235) = 4 / 15 = 26.7\%$

#### **Targeting precision of CD4bs-directed antibodies.**

The targeting precision of the CD4bs-directed antibodies was defined as the buried surface area inside of the CD4 binding site minus the buried surface area outside of the CD4 binding site. The buried surface area of each antigen residue was determined by NACCESS. The buried surface area from the following residue numbers were considered inside of the CD4 binding site: 257, 279, 280, 281, 282, 283, 365, 366, 367, 368, 370, 371, 455, 456, 457, 458, 459, 460, 469, 472, 473, 474, 475, 476, and 477 (Zhou et al., 2007). The buried surface areas from the rest of the residues were considered outside of the CD4 binding site. Somatic hypermutation was defined using nucleotide sequences and  $P$  values were calculated based on linear regression.

#### **Antibody binding orientation calculation.**

To calculate the relative rotation angles and translation to gp120-bound CD4 for gp120-bound CD4-binding site antibodies, all antibody-gp120 complexes to be analyzed were first superposed over the outer domain of gp120 (residue ranges: 252-392, 412-422, 437-476) with gp120 in its CD4 complex (PDB ID: 2NXY). The calculations of rotation angles and translation were then carried out with the gp120-aligned structures. For comparison of position of heavy chain variable domain relative to gp120-bound CD4, the framework regions (residues 46-52, 56-59, 66-71 and 76-82) were superimposed to regions of CD4 domain 1 (residues 34-40, 43-46, 54-59, 65-71). The superposition procedures were performed with the Superpose Molecules module in CCP4 (Collaborative Computational Project, 1994). The Chi angle and distance between centroids in the Superpose output was taken as the rotation angle and translation distance between CD4 and a CD4-binding site antibody.

**Table S1. Characteristics of the V(D)J rearrangements of key CH235 lineage antibodies. Related to Figure 1.**

| Antibody ID | VH      | D       | JH   | Mutation frequency | CDRH3 length | VK      | JK   | Mutation frequency | CDRL3 length | Week of isolation |
|-------------|---------|---------|------|--------------------|--------------|---------|------|--------------------|--------------|-------------------|
| UCA         | 1-46*01 | 3-10*01 | 4*02 | 0.0%               | 15           | 3-15*01 | 1*01 | 0.0%               | 8            | -                 |
| CH235       | 1-46*01 | 3-10*01 | 4*02 | 7.9%               | 15           | 3-15*01 | 1*01 | 3.8%               | 8            | 41                |
| CH236       | 1-46*01 | 3-10*01 | 4*02 | 8.2%               | 15           | 3-15*01 | 1*01 | 2.8%               | 8            | 41                |
| CH239       | 1-46*01 | 3-10*01 | 4*02 | 7.9%               | 15           | 3-15*01 | 1*01 | 4.7%               | 8            | 41                |
| CH240       | 1-46*01 | 3-10*01 | 4*02 | 7.4%               | 15           | 3-15*01 | 1*01 | 3.1%               | 8            | 41                |
| CH241       | 1-46*01 | 3-10*01 | 4*02 | 11.5%              | 15           | 3-15*01 | 1*01 | 3.5%               | 8            | 41                |
| CH235.6     | 1-46*01 | 3-10*01 | 4*02 | 12.6%              | 15           | 3-15*01 | 1*01 | 3.5%               | 8            | 66 <sup>^</sup>   |
| CH235.7     | 1-46*01 | 3-10*01 | 4*02 | 14.8%              | 15           | 3-15*01 | 1*01 | 2.8%               | 8            | 100 <sup>#</sup>  |
| CH235.8     | 1-46*01 | 3-10*01 | 4*02 | 12.0%              | 15           | 3-15*01 | 1*01 | 3.5%               | 8            | 100 <sup>^</sup>  |
| CH235.9     | 1-46*01 | 3-10*01 | 4*02 | 19.6%              | 15           | 3-15*01 | 1*01 | 2.8%               | 8            | 152 <sup>#</sup>  |
| CH235.10    | 1-46*01 | 3-10*01 | 4*02 | 21.6%              | 15           | 3-15*01 | 1*01 | 16.7%              | 8            | 264               |
| CH235.11    | 1-46*01 | 3-10*01 | 4*02 | 25.1%              | 15           | 3-15*01 | 1*01 | 17.6%              | 8            | 323               |
| CH235.12    | 1-46*01 | 3-10*01 | 4*02 | 25.7%              | 15           | 3-15*01 | 1*01 | 12.9%              | 8            | 323               |
| CH235.13    | 1-46*01 | 3-10*01 | 4*02 | 23.5%              | 15           | 3-15*01 | 1*01 | 11.6%              | 8            | 323               |

<sup>^</sup> Paired with CH241 V-light chain and complemented with CH241 V-heavy.

<sup>#</sup> Paired with CH236 V-light chain and complemented with CH236 V-heavy.

Mutation frequency is calculated on nucleotide sequences of the whole V(D)J rearrangement compared to UCA.

CDR H3 and CDR L3 lengths are expressed in amino acids.

**Table S2. Summary of the Breadth and Potency of Antibody Neutralization Against 199 HIV-1 Env-Pseudoviruses. Related to Figure 1.**

| Virus ID        | Clade | CH235 | CH235.9 | CH235.12 | VRC01 |
|-----------------|-------|-------|---------|----------|-------|
| 0260.v5.c36     | A     | >50   | 10.5    | 1.02     | 0.468 |
| 0330.v4.c3      | A     | >50   | 1.88    | 0.313    | 0.047 |
| 0439.v5.c1      | A     | >50   | 3.49    | 0.374    | 0.129 |
| 3365.v2.c20     | A     | >50   | 1.29    | 0.068    | 0.030 |
| 3415.v1.c1      | A     | >50   | 3.20    | 0.450    | 0.084 |
| 3718.v3.c11     | A     | 12.3  | 1.80    | 0.360    | 0.165 |
| 398-F1_F6_20    | A     | >50   | 5.48    | 1.76     | 0.181 |
| BB201.B42       | A     | >50   | 7.20    | 0.573    | 0.316 |
| BG505.W6M.C2    | A     | >50   | 0.823   | 0.111    | 0.053 |
| BI369.9A        | A     | >50   | 1.95    | 0.290    | 0.224 |
| BS208.B1        | A     | >50   | 1.77    | 0.263    | 0.022 |
| KER2008.12      | A     | >50   | >50     | >50      | 0.591 |
| KER2018.11      | A     | >50   | 9.89    | 2.52     | 0.555 |
| KNH1209.18      | A     | >50   | 1.21    | 0.251    | 0.099 |
| MB201.A1        | A     | >50   | 12.9    | 0.333    | 0.212 |
| MB539.2B7       | A     | >50   | 11.7    | 1.71     | 0.500 |
| MI369.A5        | A     | >50   | 2.64    | 0.416    | 0.269 |
| MS208.A1        | A     | >50   | 2.77    | 0.463    | 0.178 |
| Q23.17          | A     | 1.35  | 0.405   | 0.132    | 0.052 |
| Q259.17         | A     | >50   | 7.46    | 0.100    | 0.075 |
| Q769.d22        | A     | >50   | 0.981   | 0.110    | 0.035 |
| Q769.h5         | A     | >50   | 2.55    | 0.139    | 0.062 |
| Q842.d12        | A     | 8.15  | 0.378   | 0.091    | 0.038 |
| QH209.14M.A2    | A     | >50   | 5.76    | 0.374    | 0.060 |
| RW020.2         | A     | 1.20  | 1.05    | 0.301    | 0.203 |
| UG037.8         | A     | >50   | 1.10    | 0.188    | 0.089 |
| 246-F3.C10.2    | AC    |       | 1.33    |          |       |
| 3301.V1.C24     | AC    | 20.9  | 1.91    | 0.473    | 0.097 |
| 3589.V1.C4      | AC    | >50   | >50     | 0.309    | 0.047 |
| 6540.v4.c1      | AC    | >50   | >50     | >50      | >50   |
| 6545.V4.C1      | AC    | >50   | >50     | >50      | >50   |
| 0815.V3.C3      | ACD   | >50   | 0.549   | 0.056    | 0.015 |
| 6095.V1.C10     | ACD   | >50   | 3.29    | 1.33     | 0.506 |
| 3468.V1.C12     | AD    | 2.47  | 0.659   | 0.070    | 0.050 |
| Q168.a2         | AD    | >50   | 1.10    | 0.261    | 0.098 |
| Q461.e2         | AD    | >50   | 6.95    | 0.818    | 0.497 |
| 620345.c1       | AE    | >50   | 8.61    | 1.94     | >50   |
| BJOX009000.02.4 | AE    | >50   | >50     | 5.50     | 1.54  |
| BJOX010000.06.2 | AE    | >50   | >50     | 10.6     | 6.79  |
| BJOX025000.01.1 | AE    | 40.6  | 0.586   | 0.271    | 8.46  |
| BJOX028000.10.3 | AE    | >50   | 0.886   | 0.168    | 0.256 |
| C1080.c3        | AE    | >50   | 13.3    | 2.69     | 2.10  |
| C2101.c1        | AE    | 12.6  | 3.37    | 0.261    | 0.179 |
| C3347.c11       | AE    | >50   | 0.482   | 0.117    | 0.095 |
| C4118.09        | AE    | 3.30  | 1.04    | 0.084    | 0.248 |
| CM244.ec1       | AE    | 1.19  |         | 0.160    | 0.089 |
| CNE3            | AE    | >50   | >50     | 2.45     | 1.63  |
| CNE5            | AE    | 17.6  | 2.94    | 1.03     | 0.323 |
| CNE55           | AE    | >50   | 1.90    | 0.400    | 0.359 |
| CNE56           | AE    | 42.9  | 2.96    | 1.10     | 0.343 |
| CNE59           | AE    | 13.6  | 3.79    | 0.943    | 0.623 |
| CNE8            | AE    | >50   | 3.22    | 1.10     | 0.510 |
| R1166.c1        | AE    | >50   | 34.4    | 0.758    | 3.00  |
| R2184.c4        | AE    | 5.82  | 6.83    | 0.563    | 0.133 |
| R3265.c6        | AE    | >50   | 35.0    | 0.172    | 0.710 |
| TH966.8         | AE    | 0.732 | 1.70    | 0.304    | 0.284 |
| TH976.17        | AE    | 0.975 | 0.935   | 0.286    | 0.332 |
| 235-47          | AG    | >50   | 2.25    | 0.293    | 0.061 |
| 242-14          | AG    | >50   | >50     | 2.83     | >50   |
| 263-8           | AG    | >50   | 2.93    | 0.447    | 0.168 |

| Virus ID        | Clade | CH235 | CH235.9 | CH235.12 | VRC01 |
|-----------------|-------|-------|---------|----------|-------|
| 269-12          | AG    | >50   | >50     | >50      | 0.293 |
| 271-11          | AG    | >50   | 0.652   | 0.090    | 0.054 |
| 928-28          | AG    | >50   | 3.55    | 0.542    | 0.476 |
| DJ263.8         | AG    | >50   | 2.90    | 0.276    | 0.066 |
| T250-4          | AG    | >50   | >50     | >50      | >50   |
| T251-18         | AG    | >50   | >50     | 4.02     | 4.42  |
| T253-11         | AG    | >50   | >50     | 1.65     | 0.501 |
| T255-34         | AG    | >50   | 7.83    | 0.608    | 0.725 |
| T257-31         | AG    | >50   | 13.3    | 2.66     | 2.47  |
| T266-60         | AG    | >50   | >50     | 10.3     | 2.37  |
| T278-50         | AG    | >50   | >50     | >50      | >50   |
| T280-5          | AG    | >50   | 0.308   | 0.109    | 0.059 |
| T33-7           | AG    | >50   | 0.469   | 0.039    | 0.019 |
| 3988.25         | B     | >50   | 3.49    | 0.917    | 0.369 |
| 5768.04         | B     | >50   | 3.75    | 0.715    | 0.354 |
| 6101.10         | B     | >50   | 3.14    | 0.467    | 0.023 |
| 6535.3          | B     | >50   | >50     | 4.85     | 2.10  |
| 7165.18         | B     | >50   | >50     | >50      | 45.0  |
| 45_01dG5        | B     | >50   | 0.507   | 0.058    | 0.011 |
| 89.6.DG         | B     | >50   | 27.7    | 2.23     | 1.30  |
| AC10.29         | B     | >50   | 9.55    | 2.13     | 1.41  |
| ADA.DG          | B     | >50   | 2.88    | 0.907    | 0.563 |
| Bal.01          | B     | >50   | 0.326   | 0.237    | 0.124 |
| Bal.26          | B     | >50   | 1.10    | 0.214    | 0.060 |
| BG1168.01       | B     | >50   | 4.06    | 1.42     | 0.738 |
| BL01.DG         | B     | >50   | >50     | >50      | >50   |
| BR07.DG         | B     | >50   | 4.66    | 1.51     | 1.81  |
| BX08.16         | B     | >50   | >50     | 2.35     | 0.389 |
| CAAN.A2         | B     | >50   | 7.47    | 2.23     | 0.963 |
| CNE10           | B     | >50   | 23.2    | 5.26     | 0.689 |
| CNE12           | B     | >50   | 8.19    | 2.56     | 0.695 |
| CNE14           | B     | >50   | 12.5    | 0.594    | 0.199 |
| CNE4            | B     | >50   | 5.97    | 1.16     | 0.639 |
| CNE57           | B     | >50   | >50     | 1.25     | 0.496 |
| HO86.8          | B     | >50   | 1.35    | 0.174    | >50   |
| HT593.1         | B     | >50   | 2.23    | 0.984    | 0.606 |
| HXB2.DG         | B     | 18.1  | 0.243   | 0.173    | 0.063 |
| JRCSF.JB        | B     | >50   | 1.65    | 0.596    | 0.436 |
| JRFL.JB         | B     | 1.82  | 2.13    | 0.127    | 0.051 |
| MN.3            | B     | >50   | 1.27    | 0.142    | 0.011 |
| PVO.04          | B     | >50   | 3.53    | 1.47     | 0.552 |
| QH0515.01       | B     | 26.4  | 7.95    | 1.40     | 1.43  |
| QH0692.42       | B     | >50   | 10.8    | 2.25     | 1.37  |
| REJO.67         | B     | >50   | >50     | 1.09     | 0.113 |
| RHPA.7          | B     | 16.6  | 0.300   | 0.091    | 0.051 |
| SC422.8         | B     | >50   | 3.73    | 0.798    | 0.127 |
| SF162.LS        | B     | >50   | 2.21    | 0.534    | 0.228 |
| SS1196.01       | B     | >50   | >50     | 0.827    | 0.246 |
| THRO.18         | B     | >50   | >50     | >50      | 4.63  |
| TRJO.58         | B     | >50   | 1.76    | 0.524    | 0.116 |
| TRO.11          | B     | 14.8  | 4.68    | 0.714    | 0.502 |
| WITO.33         | B     | >50   | 3.65    | 0.418    | 0.140 |
| X2278.C2.B6     | B     | >50   | 5.96    | 0.425    | 0.133 |
| YU2.DG          | B     | >50   | 0.761   | 0.235    | 0.113 |
| BJOX002000.03.2 | BC    | >50   | 2.74    | 0.739    | >50   |
| CH038.12        | BC    | >50   | >50     | 17.3     | 0.519 |
| CH070.1         | BC    | >50   | >50     | 2.39     | 9.99  |
| CH117.4         | BC    | >50   | 1.03    | 0.340    | 0.095 |
| CH119.10        | BC    | >50   | 3.68    | 1.24     | 0.577 |
| CH181.12        | BC    | >50   | 3.44    | 0.612    | 0.481 |



| Virus ID       | Clade | CH235 | CH235.9 | CH235.12 | VRC01 |
|----------------|-------|-------|---------|----------|-------|
| CNE15          | BC    | 15.2  | 1.16    | 0.249    | 0.100 |
| CNE19          | BC    | 27.5  | 0.488   | 0.134    | 0.169 |
| CNE20          | BC    | >50   | 1.09    | 0.254    | 9.25  |
| CNE21          | BC    | >50   | 1.81    | 0.527    | 0.357 |
| CNE40          | BC    | >50   | 0.477   | 0.207    | 0.370 |
| CNE7           | BC    | >50   | >50     | 1.36     | 0.286 |
| 286.36         | C     | >50   | 3.00    | 0.699    | 0.322 |
| 288.38         | C     | >50   | 3.62    | 1.62     | 1.49  |
| 0013095-2.11   | C     | >50   | >50     | 29.7     | 0.088 |
| 001428-2.42    | C     | >50   | 0.417   | 0.087    | 0.008 |
| 0077_V1.C16    | C     | >50   | 41.7    | 6.84     | 1.28  |
| 00836-2.5      | C     | >50   | >50     | 1.09     | 0.119 |
| 0921.V2.C14    | C     | 10.9  | 1.76    | 0.344    | 0.182 |
| 16055-2.3      | C     | >50   | 0.768   | 0.159    | 0.063 |
| 16845-2.22     | C     | >50   | 28.0    | 7.47     | 3.60  |
| 16936-2.21     | C     | >50   | 1.85    | 0.500    | 0.110 |
| 25710-2.43     | C     | >50   | 0.983   | 0.382    | 0.594 |
| 25711-2.4      | C     | >50   | 4.57    | 0.974    | 0.555 |
| 25925-2.22     | C     | >50   | 2.51    | 0.641    | 0.474 |
| 26191-2.48     | C     | >50   | 1.65    | 0.583    | 0.166 |
| 3168.V4.C10    | C     | >50   | 6.56    | 0.372    | 0.255 |
| 3637.V5.C3     | C     | >50   | 10.5    | 12.2     | 1.45  |
| 3873.V1.C24    | C     | >50   | >50     | >50      | 0.791 |
| 6322.V4.C1     | C     | >50   | 4.74    | 0.944    | >50   |
| 6471.V1.C16    | C     | >50   | >50     | >50      | >50   |
| 6631.V3.C10    | C     | >50   | >50     | 5.83     | >50   |
| 6644.V2.C33    | C     | >50   | >50     | >50      | 0.243 |
| 6785.V5.C14    | C     | >50   | >50     | >50      | 0.286 |
| 6838.V1.C35    | C     | >50   | 4.54    | 1.08     | 0.210 |
| 96ZM651.02     | C     | >50   | 4.37    | 1.18     | 0.570 |
| BR025.9        | C     | >50   | >50     | >50      | 0.593 |
| CAP210.E8      | C     | >50   | >50     | >50      | >50   |
| CAP244.D3      | C     | >50   | 13.2    | 1.52     | 1.33  |
| CAP256.206.C9  | C     | 14.6  | 3.73    | 1.32     | 0.971 |
| CAP45.G3       | C     | >50   | 4.00    | 0.568    | 7.00  |
| Ce1176.A3      | C     | >50   | 7.71    | 1.24     | 2.60  |
| CE703010217.B6 | C     | >50   | 1.70    | 0.319    | 0.366 |
| CNE30          | C     | >50   | 4.31    | 1.21     | 0.525 |
| CNE31          | C     | >50   | >50     | 2.78     | 0.786 |
| CNE53          | C     | 1.77  | 0.781   | 0.274    | 0.087 |
| CNE58          | C     | >50   | >50     | 1.95     | 0.225 |
| DU123.06       | C     | >50   | 17.5    | 4.25     | 7.92  |
| DU151.02       | C     | 3.94  | 1.33    | 0.287    | 14.8  |
| DU156.12       | C     | 9.48  | 1.65    | 0.285    | 0.086 |
| DU172.17       | C     | 1.92  | 1.74    | 0.361    | >50   |
| DU422.01       | C     | >50   | 2.85    | 0.944    | >50   |
| MW965.26       | C     | 6.10  | 3.03    | 0.573    | 0.029 |
| SO18.18        | C     | >50   | 1.24    | 0.110    | 0.058 |
| TV1.29         | C     | >50   | 11.0    | 4.63     | >50   |
| TZA125.17      | C     | >50   | >50     | >50      | >50   |
| TZBD.02        | C     | >50   | 38.9    | 0.219    | 0.078 |
| ZA012.29       | C     | 13.2  | 11.5    | 0.971    | 0.384 |
| ZM106.9        | C     | >50   | 2.09    | 0.620    | 0.311 |
| ZM109.4        | C     | >50   | 2.50    | 0.416    | 0.177 |
| ZM135.10a      | C     | >50   | >50     | >50      | 2.25  |
| ZM176.66       | C     | >50   | 1.21    | 0.183    | 0.083 |
| ZM197.7        | C     | >50   | 10.5    | 1.40     | 0.428 |
| ZM214.15       | C     | >50   | 10.1    | 2.22     | 0.893 |
| ZM215.8        | C     | 6.19  | 1.71    | 0.315    | 0.215 |
| ZM233.6        | C     | 5.71  | 5.02    | 1.25     | 1.02  |

| Virus ID         | Clade | CH235 | CH235.9 | CH235.12 | VRC01 |
|------------------|-------|-------|---------|----------|-------|
| ZM249.1          | C     | 9.99  | 0.598   | 0.273    | 0.057 |
| ZM53.12          | C     | >50   | 4.44    | 0.558    | 0.625 |
| ZM55.28a         | C     | >50   | 4.20    | 0.665    | 0.285 |
| 3326.V4.C3       | CD    | >50   | 1.54    | 0.114    | 0.068 |
| 3337.V2.C6       | CD    | >50   | 10.8    | 0.429    | 0.090 |
| 3817.v2.c59      | CD    | >50   | 14.6    | 3.63     | >50   |
| 231965.c1        | D     | >50   | >50     | 13.9     | 0.353 |
| 247-23           | D     | >50   | 3.32    | 0.691    | 1.84  |
| 3016.v6.c45      | D     | >50   | >50     | >50      | 0.155 |
| 57128.vrc15      | D     | >50   | >50     | 6.59     | >50   |
| 6405.v4.c34      | D     | >50   | >50     | >50      | 1.55  |
| A03349M1.vrc4a   | D     | >50   | 7.54    | 4.08     | 4.10  |
| A07412M1.vrc12   | D     | >50   |         | 0.351    | 0.082 |
| NKU3006.ec1      | D     | 4.61  | 1.29    | 0.466    | 0.596 |
| P0402.c2.11      | G     |       | 3.65    |          |       |
| P1981.C5.3       | G     | >50   | >50     | 2.19     | 0.330 |
| X1193.c1         | G     | >50   | 4.08    | 0.972    | 0.154 |
| X1254.c3         | G     | >50   | >50     | 1.98     | 0.059 |
| X1632.S2.B10     | G     | >50   | 1.18    | 0.484    | 0.130 |
| X2088.c9         | G     | >50   | >50     | >50      | >50   |
| X2131.C1.B5      | G     | >50   | 10.3    | 2.58     | 0.537 |
| SIVmac251.30.SG3 | NA    | >50   | >50     | >50      | >50   |
| SVA.MLV          | NA    | >50   | >50     | >50      | >50   |

IC50 (µg/ml)

|            |
|------------|
| <0.100     |
| 0.100-1.00 |
| 1.00-10.0  |
| >10.0      |
| >50        |

|                             | CH235 | CH235.9 | CH235.12 | VRC01 |
|-----------------------------|-------|---------|----------|-------|
| # Viruses                   | 202   | 202     | 202      | 202   |
| <b>Total VS Neutralized</b> |       |         |          |       |
| IC50 <50 µg/ml              | 35    | 153     | 179      | 179   |
| IC50 <10 µg/ml              | 19    | 130     | 173      | 177   |
| IC50 <1.0 µg/ml             | 2     | 25      | 115      | 146   |
| IC50 <0.1 µg/ml             | 0     | 0       | 10       | 47    |
| IC50 <0.01 µg/ml            | 0     | 0       | 0        | 1     |
| <b>% VS Neutralized</b>     |       |         |          |       |
| IC50 <50 µg/ml              | 17    | 76      | 89       | 89    |

**Table S3. Crystallographic Data Collection and Refinement Statistics. Related to Figure 2.**

| Complex (antibody-gp120)                             | CH235-93TH057           | CH235.9-93TH057                                | CH235.12-93TH057  |
|------------------------------------------------------|-------------------------|------------------------------------------------|-------------------|
| <b>PDB ID</b>                                        | 5F9W                    | 5F9O                                           | 5F96              |
| <b>Data collection</b>                               |                         |                                                |                   |
| Space group                                          | P3 <sub>2</sub>         | P 2 <sub>1</sub> 2 <sub>1</sub> 2 <sub>1</sub> | P 2 <sub>1</sub>  |
| Cell dimensions                                      |                         |                                                |                   |
| <i>a, b, c</i> (Å)                                   | 123.4, 123.4, 127.3     | 63.5, 67.8, 225.6                              | 53.7, 69.9, 127.3 |
| $\alpha, \beta, \gamma$ (°)                          | 90.0, 90.0, 120.0       | 90.0, 90.0, 90.0                               | 90.0, 94.6, 90.0  |
| Resolution (Å)                                       | 40.94-2.89 (2.99-2.89)* | 50.0-1.86 (2.00-1.93; 1.93-1.86)               | 2.25 (2.29-2.25)  |
| <i>R</i> <sub>sym</sub> or <i>R</i> <sub>merge</sub> | 0.22 (0.68)             | 14.1 (41.8; 48.4)                              | 12.5 (41.4)       |
| <i>I</i> / $\sigma$ <i>I</i>                         | 8.9 (1.9)               | 7.06 (1.79; 1.25)                              | 15.5 (2.1)        |
| Completeness (%)                                     | 100 (100)               | 89.7 (73.4; 46.8)                              | 97.6 (86.7)       |
| Redundancy                                           | 7.6 (6.7)               | 3.4 (1.6; 1.2)                                 | 3.0 (2.1)         |
| <b>Refinement</b>                                    |                         |                                                |                   |
| Resolution (Å)                                       | 40.9 – 2.89             | 35.8-1.86                                      | 34.5-2.25         |
| No. reflections                                      | 48360                   | 73935                                          | 43920             |
| <i>R</i> <sub>work</sub> / <i>R</i> <sub>free</sub>  | 17.5/22.9               | 20.4/22.0                                      | 18.3/23.0         |
| No. atoms                                            |                         |                                                |                   |
| Protein                                              | 11932                   | 6137                                           | 5976              |
| Ligand/ion                                           | 393                     | 53                                             | 213               |
| Water                                                | 74                      | 461                                            | 196               |
| B-factors (Å <sup>2</sup> )                          |                         |                                                |                   |
| Protein                                              | 92.5                    | 43.5                                           | 63.4              |
| Ligand/ion                                           | 120.9                   | 87.0                                           | 103.4             |
| Water                                                | 77.5                    | 47.2                                           | 59.3              |
| R.m.s deviations                                     |                         |                                                |                   |
| Bond lengths (Å)                                     | 0.004                   | 0.008                                          | 0.006             |
| Bond angles (°)                                      | 0.78                    | 1.27                                           | 0.92              |
| Ramachandran statistics                              |                         |                                                |                   |
| Favored (%)                                          | 96.0                    | 97.1                                           | 97.0              |
| Outliers (%)                                         | 0.1                     | 0.0                                            | 0.1               |

\*Values in parenthesis denote highest resolution shell.

**Table S4. Sequence Similarity Between VH1-2 and VH1-46 Broadly Neutralizing Antibodies and Mutability of Germline Genes. Related to Figure 3.**

- A. The probability of a conforming VH1-46 antibody with  $x$   $V_H$  mutations, having  $c$  common mutation positions with a reference antibody were estimated based on 100,000 simulated events, with the likelihood of each residue being mutated based on uniform distribution (position) ( $P_{\text{uniform}}$ ), or the mutation frequency at each residue position derived from the VH1-46 antibodies ( $P_{\text{VH1-46}}$ ).

| Conforming antibody | # mutations ( $x$ ) | Reference antibody | # sharing mutation positions ( $c$ ) | Probability of seeing $c$ based on:           |                                                     | $P_{\text{VH1-46}}/P_{\text{uniform}}$ |
|---------------------|---------------------|--------------------|--------------------------------------|-----------------------------------------------|-----------------------------------------------------|----------------------------------------|
|                     |                     |                    |                                      | Uniform distribution ( $P_{\text{uniform}}$ ) | VH1-46 mutation frequencies ( $P_{\text{VH1-46}}$ ) |                                        |
| CH235               | 15                  | 1B2530             | 11                                   | 0.00432                                       | 0.17751                                             | 41.1                                   |
| CH235               | 15                  | 8ANC131            | 13                                   | 0.00010                                       | 0.01744                                             | 174.4                                  |
| 1B2530              | 39                  | 8ANC131            | 26                                   | 0.00001                                       | 0.04274                                             | 4274.0                                 |

- B. The probability of a conforming VH1-46 antibody with  $x$   $V_H$  mutations, having  $i$  identical mutations with a reference antibody were estimated based on 100,000 simulated events, with the likelihood of each residue being mutated based on uniform distribution (position and mutation type) ( $P_{\text{uniform}}$ ), or the mutation frequency at each residue position derived from the VH1-46 antibodies ( $P_{\text{VH1-46}}$ ).

| Conforming antibody | # mutations ( $x$ ) | Reference antibody | # identical mutations ( $i$ ) | Probability of seeing $i$ based on:           |                                                     | $P_{\text{VH1-46}}/P_{\text{uniform}}$ |
|---------------------|---------------------|--------------------|-------------------------------|-----------------------------------------------|-----------------------------------------------------|----------------------------------------|
|                     |                     |                    |                               | Uniform distribution ( $P_{\text{uniform}}$ ) | VH1-46 mutation frequencies ( $P_{\text{VH1-46}}$ ) |                                        |
| CH235               | 15                  | 1B2530             | 4                             | 0.00022                                       | 0.10433                                             | 474.2                                  |
| CH235               | 15                  | 8ANC131            | 4                             | 0.00019                                       | 0.11546                                             | 607.7                                  |
| 1B2530              | 39                  | 8ANC131            | 7                             | 0.00001                                       | 0.14622                                             | 14622.0                                |

- C. Pearson correlation coefficients of positional somatic mutation frequency between VH1-46, VH1-2 and three others.

|          | IGHV1-2 | IGHV1-46 | IGHV1-69 | IGHV3-23 | IGHV3-30 |
|----------|---------|----------|----------|----------|----------|
| IGHV1-46 | 0.84    |          |          |          |          |
| IGHV1-69 | 0.74    | 0.74     |          |          |          |
| IGHV3-23 | 0.54    | 0.63     | 0.68     |          |          |
| IGHV3-30 | 0.53    | 0.57     | 0.62     | 0.83     |          |
| IGHV4-59 | 0.47    | 0.53     | 0.55     | 0.67     | 0.57     |

**Table S5 - CH235 Lineage and CH106 Monoclonal Antibodies Cross-Blocking. Related to Figure 4.**

A. CH235 lineage antibodies blocking of sCD4 and CH106 binding to CH505 TF gp120 and B.63521 gp120 Envs. Results expressed as IC50 ug/ml. nb= no blocking.

|              | <b>UCA</b> | <b>IA4</b> | <b>IA3</b> | <b>IA2</b> | <b>IA1</b> | <b>CH240</b> | <b>CH236</b> | <b>CH235</b> | <b>CH239</b> | <b>CH241</b> |
|--------------|------------|------------|------------|------------|------------|--------------|--------------|--------------|--------------|--------------|
| <b>sCD4</b>  | nb         | nb         | nb         | nb         | >100       | nb           | nb           | 26.3         | 92.6         | 2.6          |
| <b>CH106</b> | nb         | nb         | nb         | nb         | 82.4       | 68.9         | 82.2         | 16.5         | 45.4         | 1.5          |

B. Monoclonal antibody CH106 blocking of CH235 lineage antibodies to CH505 TF gp120. Results expressed as IC50 ug/ml. nb= no blocking.

|              | <b>CH235</b> | <b>CH236</b> | <b>CH239</b> | <b>CH240</b> | <b>CH241</b> | <b>CH106</b> |
|--------------|--------------|--------------|--------------|--------------|--------------|--------------|
| <b>CH106</b> | 4.3          | 6.8          | 4.6          | 2.3          | 14.3         | 2.5          |



**Table S7. CH235 lineage antibodies and CH235.9 mutants neutralization of CH505 TF loop D mutant viruses. Related to Figure 5.**

|              |                   | Neutralization IC50 ug/ml) |             |             |              |              |             |             |                 |                 |                 |                 | CH235.9          |                  |
|--------------|-------------------|----------------------------|-------------|-------------|--------------|--------------|-------------|-------------|-----------------|-----------------|-----------------|-----------------|------------------|------------------|
| Virus ID     | Virus Mutations   | CH236                      | CH235.7     | CH235.10    | CH235.11     | CH235.13     | CH235.12    | CH235.9     | CH235.9<br>N30T | CH235.9<br>D31T | CH235.9<br>G62Q | CH235.9<br>G65Q | CH235.9<br>G62Q+ | CH235.9<br>A103E |
| CH505.TF     | -                 | <b>0.61</b>                | <b>0.39</b> | <b>0.22</b> | <b>2.19</b>  | <b>0.91</b>  | <b>0.22</b> | <b>0.51</b> | <b>4.26</b>     | <b>0.43</b>     | <b>0.30</b>     | <b>0.26</b>     | <b>0.15</b>      | <b>0.43</b>      |
| CH505.TF.M5  | N279K             | <b>0.26</b>                | <b>0.16</b> | <b>0.17</b> | <b>0.31</b>  | <b>0.18</b>  | <b>0.02</b> | <b>0.19</b> | <b>0.90</b>     | <b>0.11</b>     | <b>0.12</b>     | <b>0.14</b>     | <b>0.12</b>      | <b>0.03</b>      |
| CH505.TF.M6  | V281A             | <b>0.80</b>                | <b>0.34</b> | <b>0.11</b> | <b>2.30</b>  | <b>0.30</b>  | <b>0.08</b> | <b>0.40</b> | <b>1.06</b>     | <b>0.12</b>     | <b>0.02</b>     | <b>0.08</b>     | <b>0.04</b>      | <b>0.16</b>      |
| CH505.TF.M10 | V281G             | <b>1.75</b>                | <b>0.18</b> | <b>0.19</b> | <b>1.52</b>  | <b>0.14</b>  | <b>0.02</b> | <b>0.24</b> | <b>0.83</b>     | <b>0.07</b>     | <b>0.02</b>     | <b>0.09</b>     | <b>0.08</b>      | <b>0.07</b>      |
| CH505.TF.M19 | V281D             | <b>7.53</b>                | <b>0.40</b> | >50         | >50          | <b>0.57</b>  | <b>0.17</b> | <b>0.63</b> | <b>4.04</b>     | <b>0.89</b>     | <b>1.36</b>     | <b>1.58</b>     | <b>1.54</b>      | <b>0.43</b>      |
| CH505.TF.M11 | N279D+V281A       | >50                        | <b>0.50</b> | <b>0.21</b> | <b>15.35</b> | <b>0.25</b>  | <b>0.08</b> | <b>0.39</b> | <b>1.25</b>     | <b>0.12</b>     | <b>0.02</b>     | <b>0.14</b>     | <b>0.13</b>      | <b>0.24</b>      |
| CH505.TF.M8  | N280S+V281A       | >50                        | >50         | >50         | <b>1.91</b>  | <b>0.86</b>  | <b>0.05</b> | <b>0.66</b> | <b>24.31</b>    | <b>0.15</b>     | <b>0.14</b>     | <b>0.12</b>     | <b>0.03</b>      | <b>0.13</b>      |
| CH505.TF.M21 | N280T+V281A       | >50                        | >50         | >50         | <b>10.16</b> | <b>16.72</b> | <b>0.13</b> | <b>0.74</b> | >50             | <b>0.23</b>     | <b>0.15</b>     | <b>0.25</b>     | <b>0.27</b>      | <b>0.19</b>      |
| CH505.TF.M20 | N280S+V281G       | >50                        | >50         | >50         | <b>7.86</b>  | <b>11.58</b> | <b>0.07</b> | <b>0.94</b> | 44.29           | <b>0.08</b>     | <b>0.11</b>     | <b>0.26</b>     | <b>0.26</b>      | <b>0.10</b>      |
| CH505.TF.M7  | E275K+N279D+V281S | >50                        | >50         | <b>0.61</b> | >50          | <b>2.12</b>  | <b>0.13</b> | <b>0.77</b> | 44.21           | <b>0.38</b>     | <b>0.37</b>     | <b>0.49</b>     | <b>0.38</b>      | <b>0.19</b>      |
| CH505.TF.M9  | E275K+N279D+V281G | >50                        | >50         | <b>0.24</b> | <b>0.46</b>  | <b>5.02</b>  | <b>0.11</b> | <b>0.85</b> | 42.75           | <b>0.25</b>     | <b>0.25</b>     | <b>0.24</b>     | <b>0.14</b>      | <b>0.14</b>      |

## Supplemental References

- Collaborative Computational Project (1994). The CCP4 suite: programs for protein crystallography. *Acta Crystallogr., Sect D: Biol. Crystallogr.* 50, 760-763.
- Edgar, R.C. (2004). MUSCLE: multiple sequence alignment with high accuracy and high throughput. *Nucleic Acids Res.* 32, 1792-1797.
- Giorgi, E.E., Funkhouser, B., Athreya, G., Perelson, A.S., Korber, B.T., Bhattacharya, T. (2010). Estimating time since infection in early homogeneous HIV-1 samples using a poisson model. *BMC Bioinformatics* 11, 532.
- Gray, E.S., Moody, M.A., Wibmer, C.K., Chen, X., Marshall, D., Amos, J., Moore, P.L., Foulger, A., Yu, J.S., Lambson, B., *et al.* (2011). Isolation of a monoclonal antibody that targets the alpha-2 helix of gp120 and represents the initial autologous neutralizing-antibody response in an HIV-1 subtype C-infected individual. *J. Virol.* 85, 7719-7729.
- Lander, G.C., Stagg, S.M., Voss, N.R., Cheng, A., Fellmann, D., Pulokas, J., Yoshioka, C., Irving, C., Mulder, A., Lau, P.W., *et al.* (2009). Appion: an integrated, database-driven pipeline to facilitate EM image processing. *J. Struct. Biol.* 166, 95-102.
- Montefiori, D.C. (2005). Evaluating neutralizing antibodies against HIV, SIV, and SHIV in luciferase reporter gene assays. *Current protocols in immunology* / edited by John E Coligan [et al] *Chapter 12*, Unit 12 11.
- Pettersen, E.F., Goddard, T.D., Huang, C.C., Couch, G.S., Greenblatt, D.M., Meng, E.C., and Ferrin, T.E. (2004). UCSF Chimera--a visualization system for exploratory research and analysis. *J. Comput. Chem.* 25, 1605-1612.
- Scheres, S.H. (2012). A Bayesian view on cryo-EM structure determination. *J. Mol. Biol.* 415, 406-418.
- Seaman, M.S., Janes, H., Hawkins, N., Grandpre, L.E., Devoy, C., Giri, A., Coffey, R.T., Harris, L., Wood, B., Daniels, M.G., *et al.* (2010). Tiered categorization of a diverse panel of HIV-1 Env pseudoviruses for assessment of neutralizing antibodies. *J. Virol.* 84, 1439-1452.
- Schrodinger, LLC (2010). The PyMOL Molecular Graphics System, Version 1.3r1.
- Suloway, C., Pulokas, J., Fellmann, D., Cheng, A., Guerra, F., Quispe, J., Stagg, S., Potter, C.S., and Carragher, B. (2005). Automated molecular microscopy: the new Legimon system. *J. Struct. Biol.* 151, 41-60.
- Tang, G., Peng, L., Baldwin, P.R., Mann, D.S., Jiang, W., Rees, I., and Ludtke, S.J. (2007). EMAN2: an extensible image processing suite for electron microscopy. *J. Struct. Biol.* 157, 38-46.
- Tomaras, G.D., Yates, N.L., Liu, P., Qin, L., Fouda, G.G., Chavez, L.L., Decamp, A.C., Parks, R.J., Ashley, V.C., Lucas, J.T., *et al.* (2008). Initial B-cell responses to transmitted human immunodeficiency virus type 1: virion-binding immunoglobulin M (IgM) and IgG antibodies followed by plasma anti-gp41 antibodies with ineffective control of initial viremia. *J. Virol.* 82, 12449-12463
- van Dongen, J.J., Langerak, A.W., Bruggemann, M., Evans, P.A., Hummel, M., Lavender, F.L., Delabesse, E., Davi, F., Schuurink, E., Garcia-Sanz, R., *et al.* (2003). Design and standardization of PCR primers and protocols for detection of clonal immunoglobulin and T-cell receptor gene recombinations in suspect lymphoproliferations: report of the BIOMED-2 Concerted Action BMH4-CT98-3936. *Leukemia* 17, 2257-2317.
- Venturi, V., Quigley, M.F., Greenaway, H.Y., Ng, P.C., Ende, Z.S., McIntosh, T., Asher, T.E., Almeida, J.R., Levy, S., Price, D.A., *et al.* (2011). A mechanism for TCR sharing between T cell subsets and individuals revealed by pyrosequencing. *J Immunol.* 186, 4285-4294.
- Wu, X., Yang, Z.Y., Li, Y., Hogerkorp, C.M., Schief, W.R., Seaman, M.S., Zhou, T., Schmidt, S.D., Wu, L., Xu, L., *et al.* (2010). Rational design of envelope identifies broadly neutralizing human monoclonal antibodies to HIV-1. *Science* 329, 856-861.

Wu, X., Zhang, Z., Schramm, C.A., Joyce, M.G., Kwon, Y.D., Zhou, T., Sheng, Z., Zhang, B., O'Dell, S., McKee, K., *et al.* (2015). Maturation and Diversity of the VRC01-Antibody Lineage over 15 Years of Chronic HIV-1 Infection. *Cell* *161*, 470-485.

Zhou, T., Xu, L., Dey, B., Hessel, A.J., Van Ryk, D., Xiang, S.H., Yang, X., Zhang, M.Y., Zwick, M.B., Arthos, J., *et al.* (2007). Structural definition of a conserved neutralization epitope on HIV-1 gp120. *Nature* *445*, 732-737.
